# Supplementary material for: Seasonal and longitudinal water quality dynamics in three effluent-dependent rivers in Arizona
Source: PeerJ journal article supplement (doi:10.7717/peerj.15069), 2023-03-29
Supplement: FigureS1.pdf [file FigureS1.pdf]

### Supplemental Figure

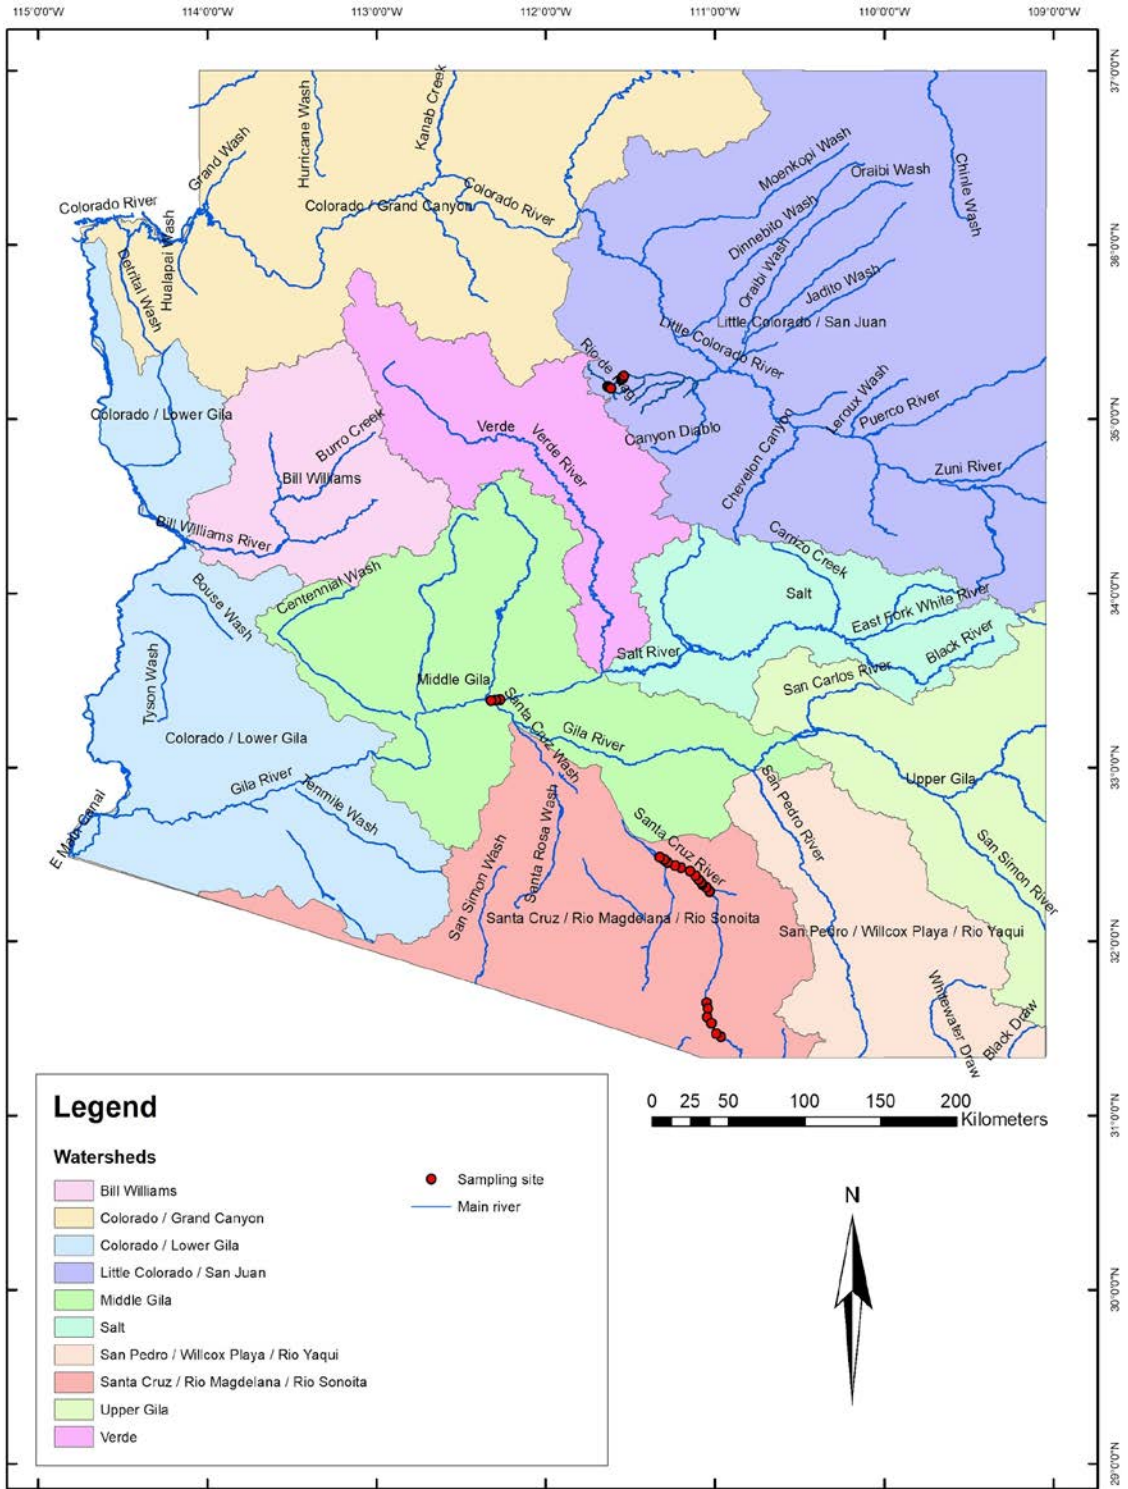

**Figure S1.** Locations of all sampling sites within each of the six study reaches across the three focal river basins in Arizona
