# Supplementary material for: Seasonal and longitudinal water quality dynamics in three effluent-dependent rivers in Arizona
Source: PeerJ journal article supplement (doi:10.7717/peerj.15069), 2023-03-29
Supplement: FigureS2.pdf [file FigureS2.pdf]

**Supplemental Figures**  
**Dissolved Oxygen**

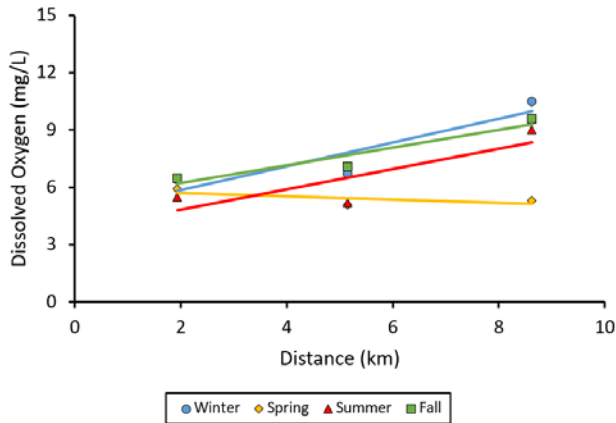

**Figure S2a.** Dissolved oxygen at the Agua Nueva reach of the Santa Cruz River, Arizona.

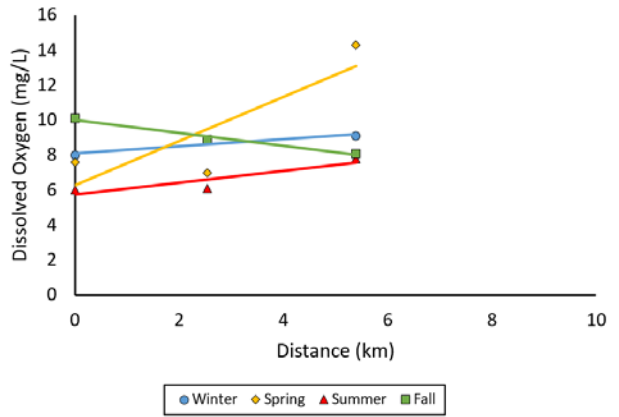

**Figure S2b.** Dissolved oxygen at the 91st Ave reach of the Salt River, Arizona.

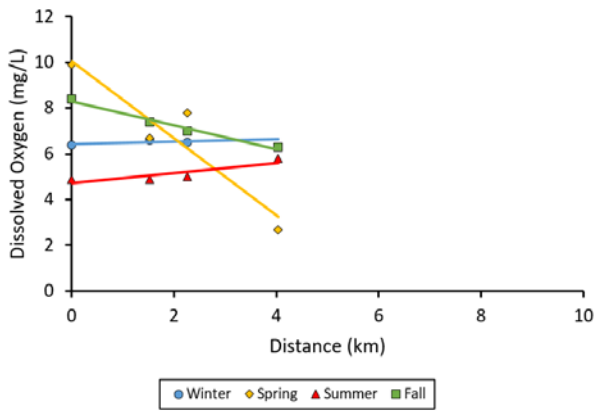

**Figure S2c.** Dissolved Oxygen at the Wildcat reach of the Rio de Flag, Arizona.

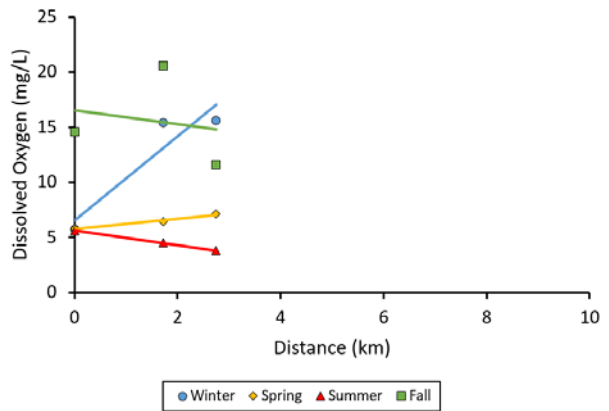

**Figure S2d.** Dissolved Oxygen at the Central reach of the Rio de Flag, Arizona.

**Temperature**

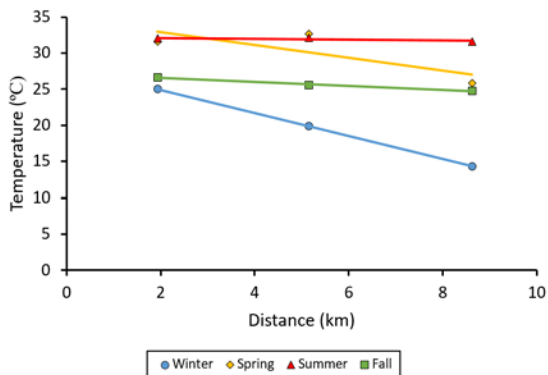

**Figure S2e.** Temperature at the Agua Nueva reach of the Santa Cruz River, Arizona.

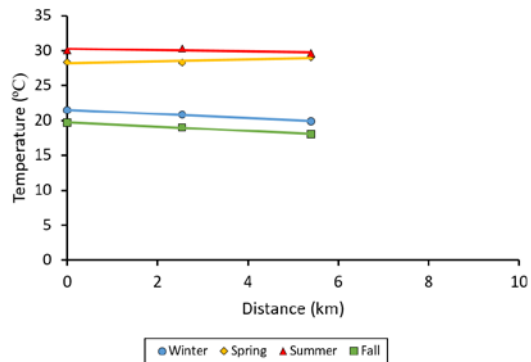

**Figure S2f.** Temperature at the 91st Ave reach of the Salt River, Arizona.

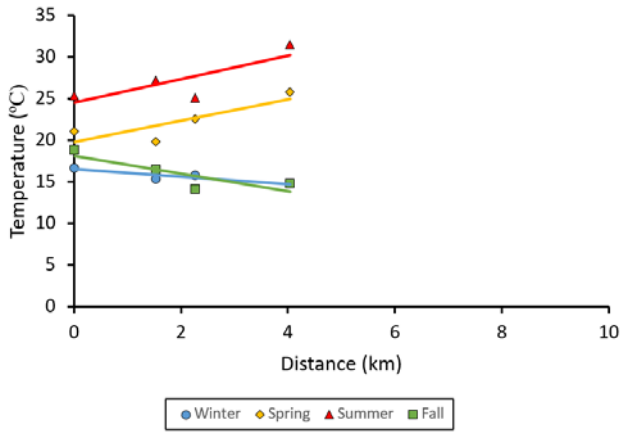

**Figure S2g.** Temperature at the Wildcat reach of the Rio de Flag, Arizona.

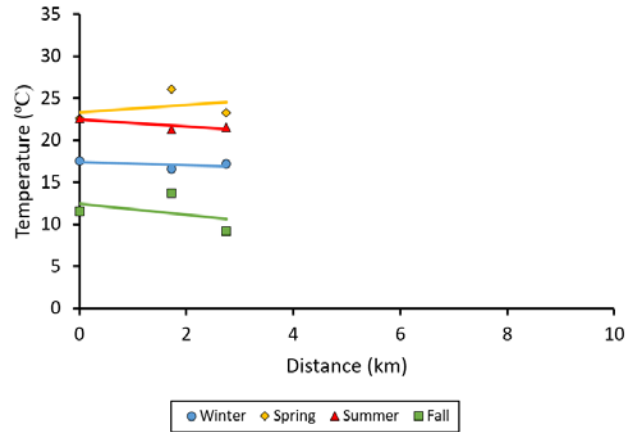

**Figure S2h.** Temperature at the Central reach of the Rio de Flag, Arizona.

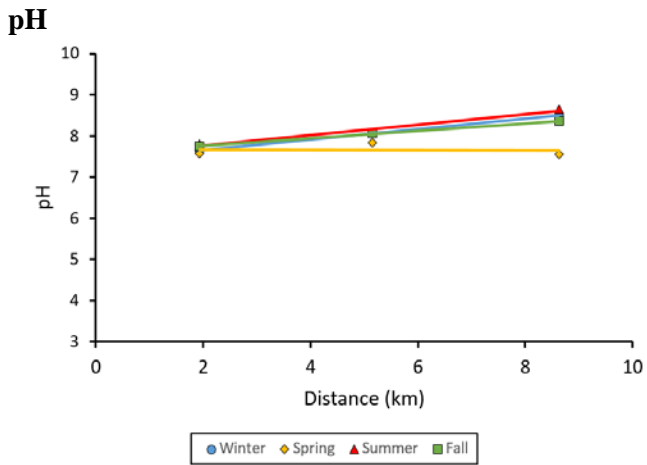

**Figure S2i.** pH at the Agua Nueva reach of the Santa Cruz River, Arizona.

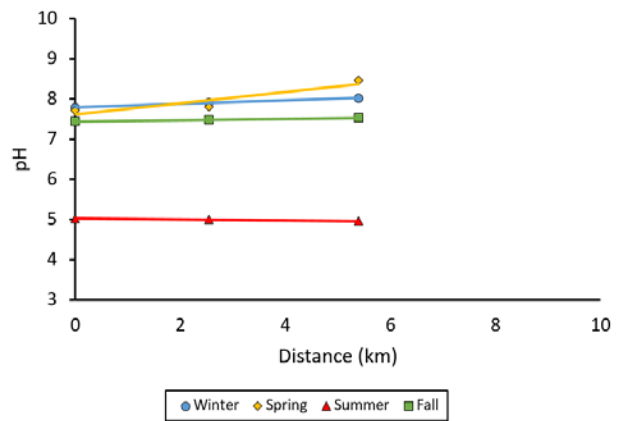

**Figure S2j.** pH at the 91st Ave reach of the Salt River, Arizona.

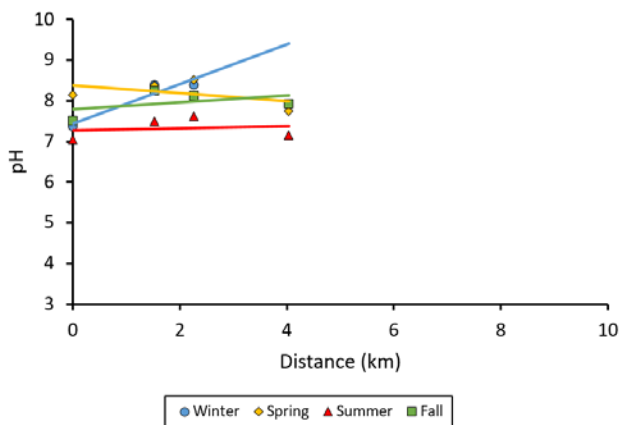

**Figure S2k.** pH at the Wildcat reach of the Rio de Flag, Arizona.

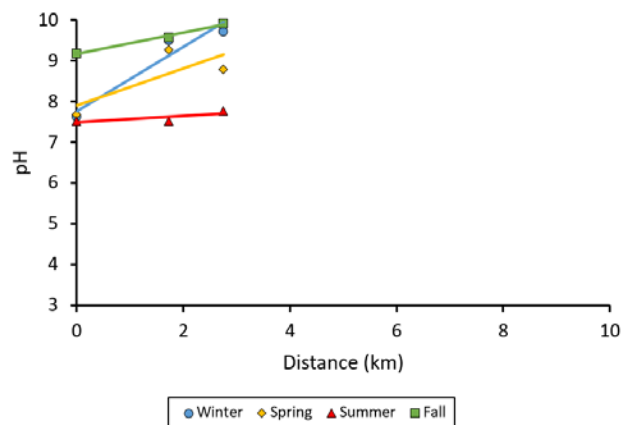

**Figure S2l.** pH at the Central reach of the Rio de Flag, Arizona.

### Conductivity

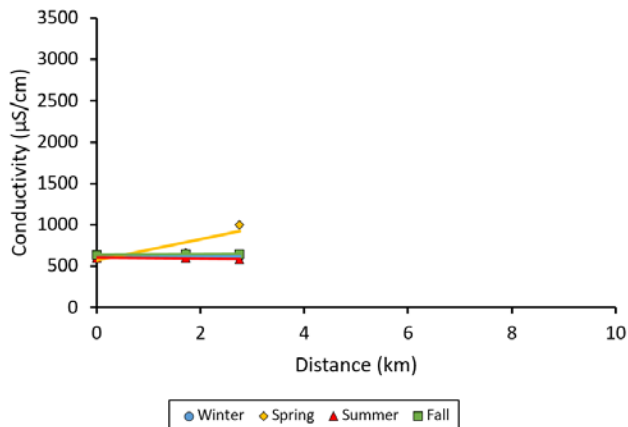

**Figure S2m.** Conductivity at the Central reach of the Rio de Flag, Arizona.

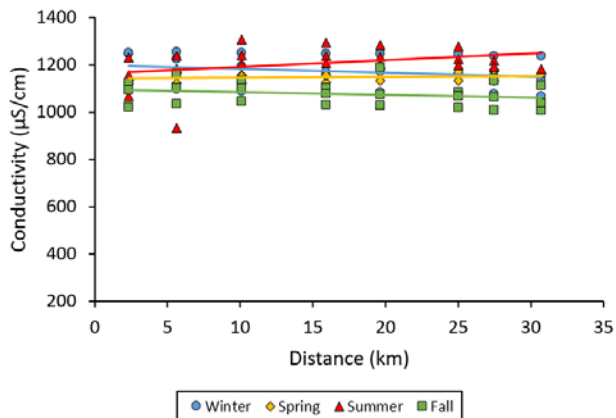

**Figure S2n.** Conductivity at the Tres Rios reach of the Santa Cruz River, Arizona.

### Alkalinity

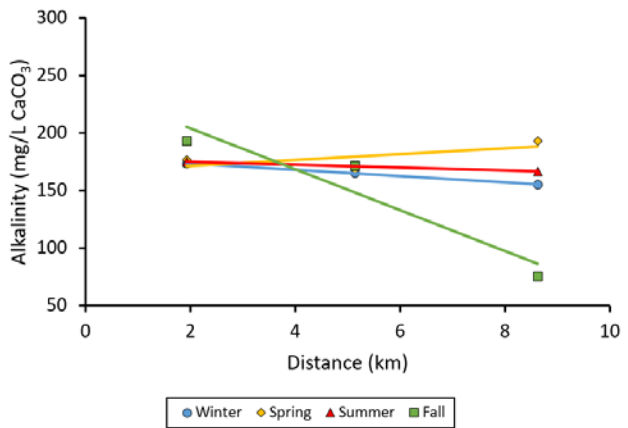

**Figure S2o.** Alkalinity at the Agua Nueva reach of the Santa Cruz River, Arizona.

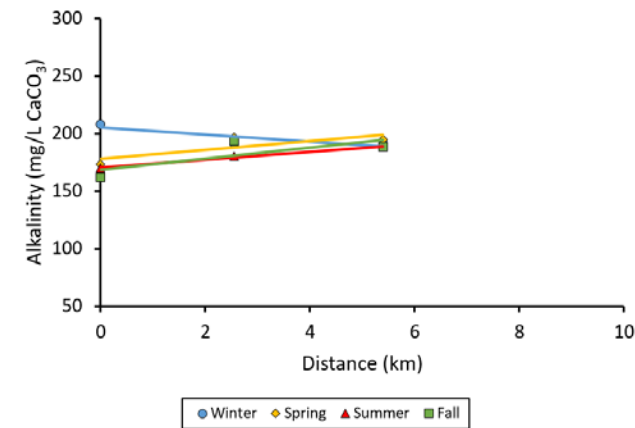

**Figure S2p.** Alkalinity at the 91st Ave reach of the Salt River, Arizona.

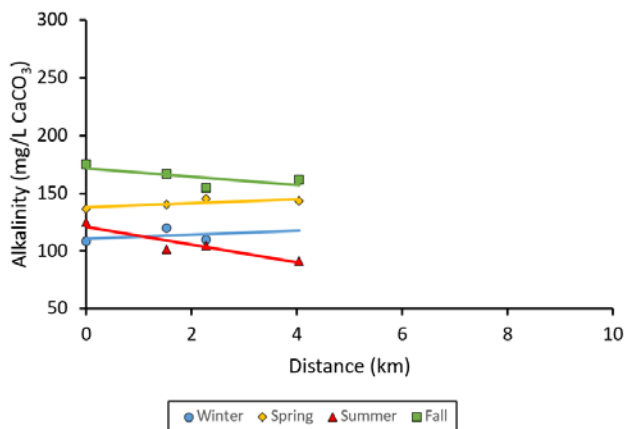

**Figure S2q.** Alkalinity at the Wildcat reach of the Rio de Flag, Arizona.

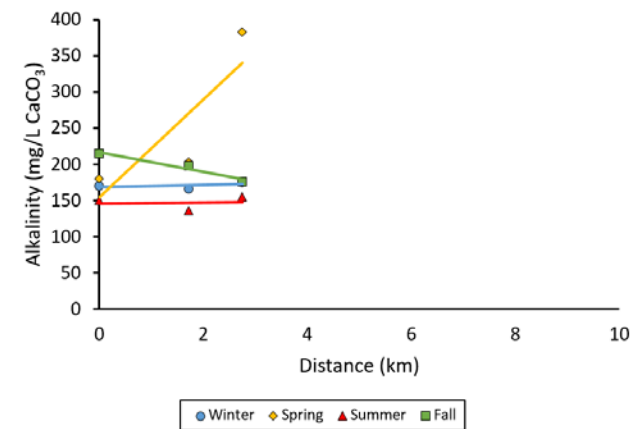

**Figure S2r.** Alkalinity at the Central reach of the Rio de Flag, Arizona.

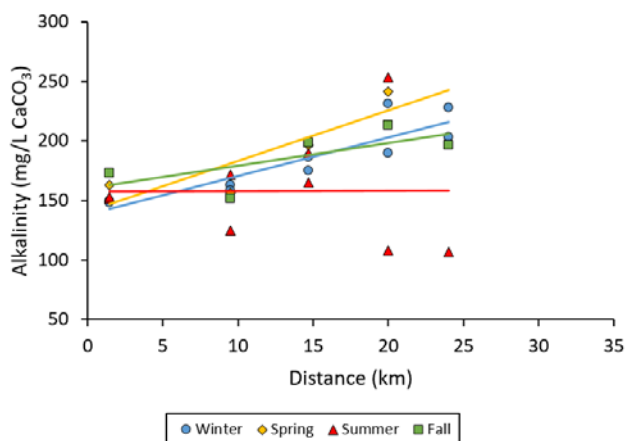

**Figure S2s.** Alkalinity at the Nogales reach of the Santa Cruz River, Arizona.

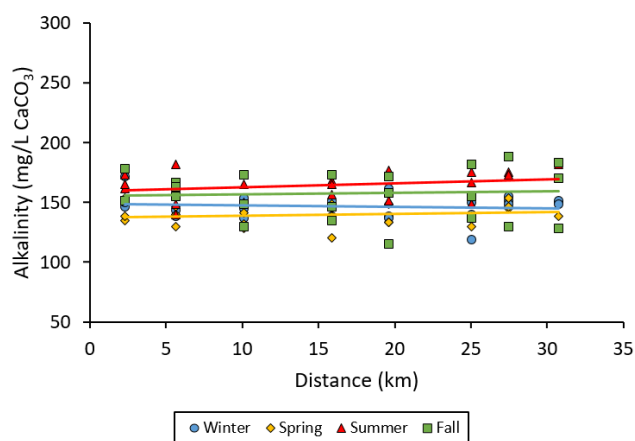

**Figure S2t.** Alkalinity at the Tres Rios reach of the Santa Cruz River, Arizona.

**Phosphorus**

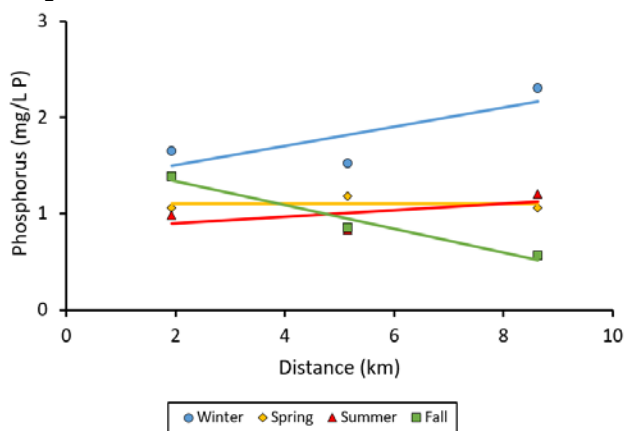

**Figure S2u.** Phosphorus at the Agua Nueva reach of the Santa Cruz River, Arizona.

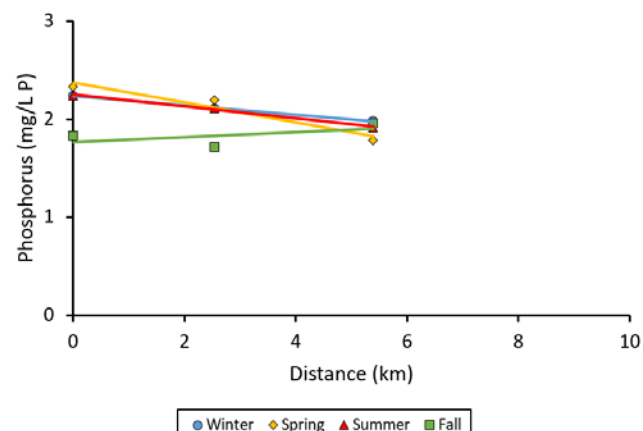

**Figure S2v.** Phosphorus at the 91st Ave reach of the Salt River, Arizona.

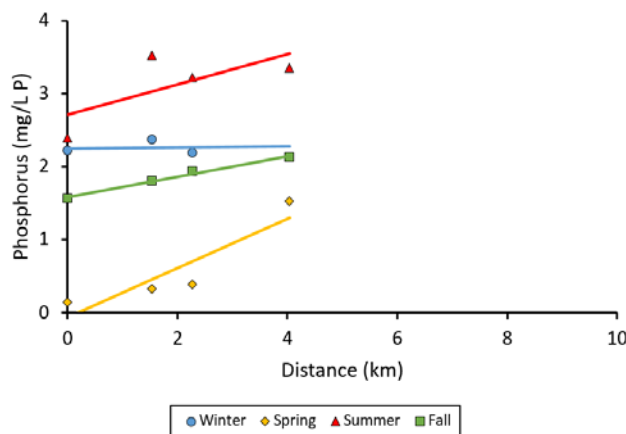

**Figure S2w.** Phosphorus at the Wildcat reach of the Rio de Flag, Arizona.

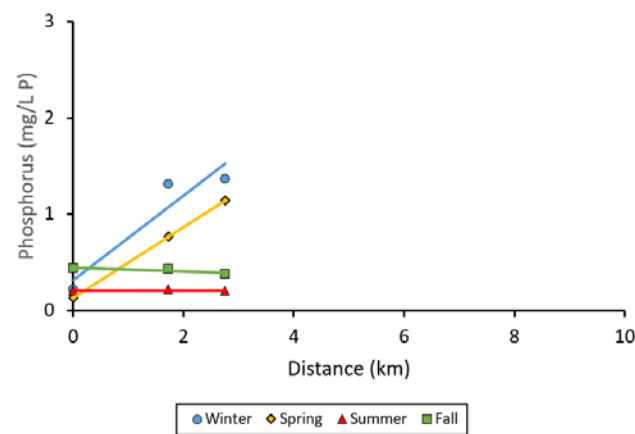

**Figure S2x.** Phosphorus at the Central reach of the Rio de Flag, Arizona.

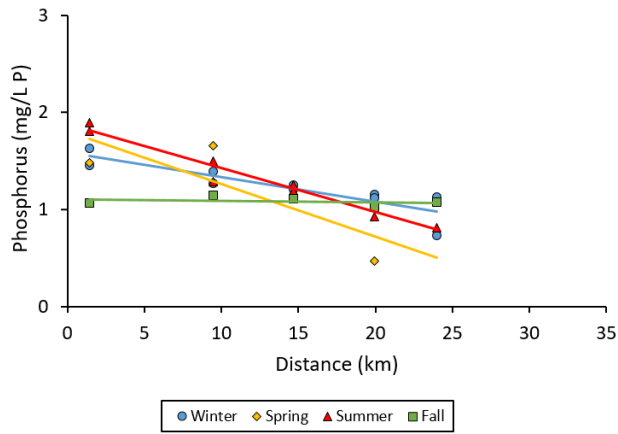

**Figure S2y.** Phosphorus at the Nogales reach of the Santa Cruz River, Arizona.

**Ammonia**

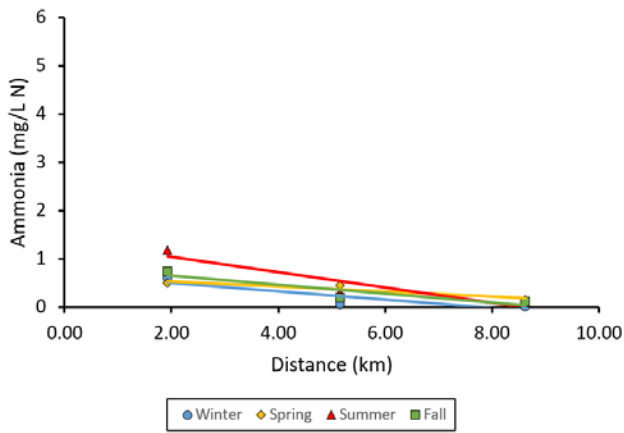

**Figure S2z.** Ammonia at the Agua Nueva reach of the Santa Cruz River, Arizona.

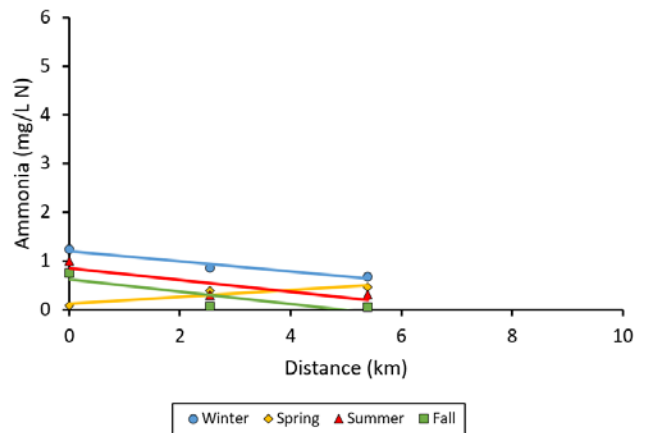

**Figure S2aa.** Ammonia at the 91st Ave reach of the Salt River, Arizona.

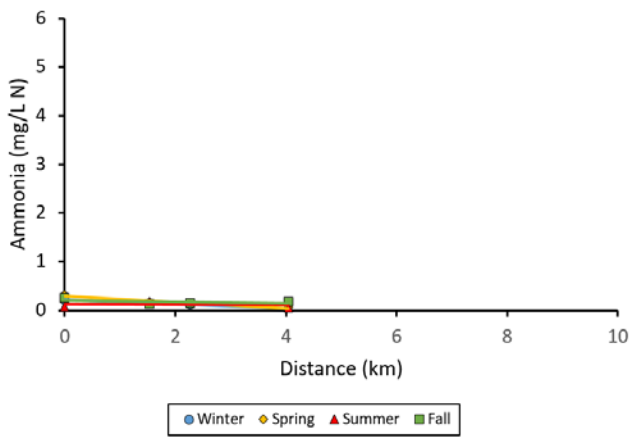

**Figure S2ab.** Ammonia at the Wildcat reach of the Rio de Flag, Arizona.

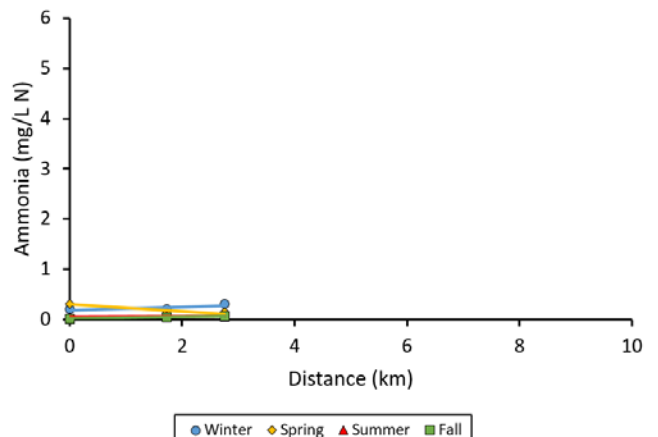

**Figure S2ac.** Ammonia at the Central reach of the Rio de Flag, Arizona.

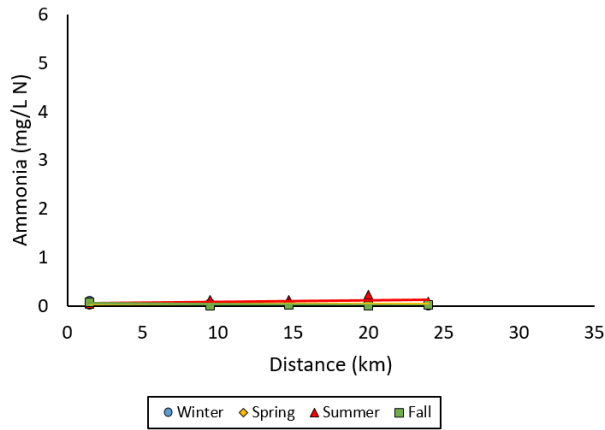

**Figure S2ad.** Ammonia at the Nogales reach of the Santa Cruz River, Arizona.

**Nitrate**

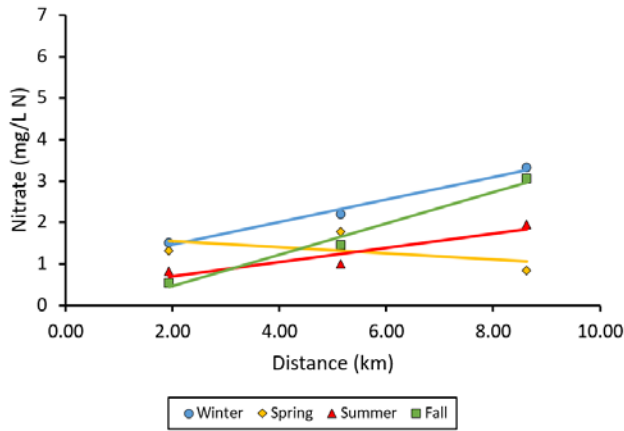

**Figure S2ae.** Nitrate at the Agua Nueva reach of the Santa Cruz River, Arizona.

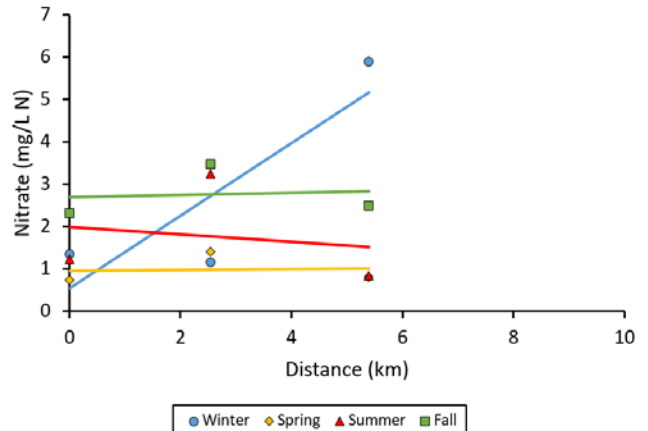

**Figure S2af.** Nitrate at the 91st Ave reach of the Salt River, Arizona.

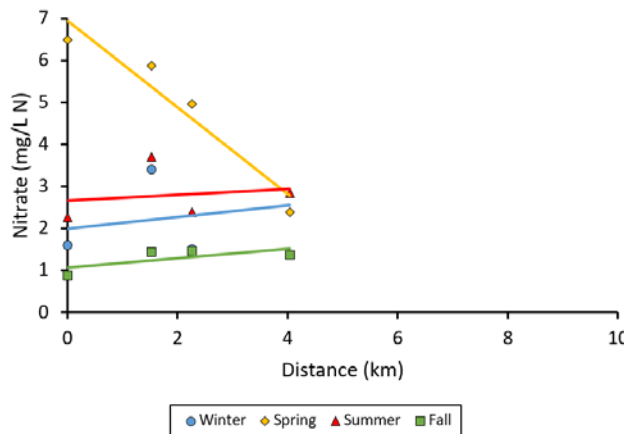

**Figure S2ag.** Nitrate at the Wildcat reach of the Rio de Flag, Arizona.

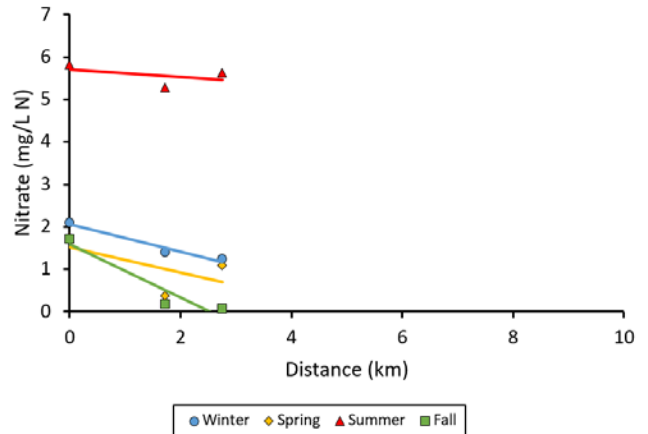

**Figure S2ah.** Nitrate at the Central reach of the Rio de Flag, Arizona.

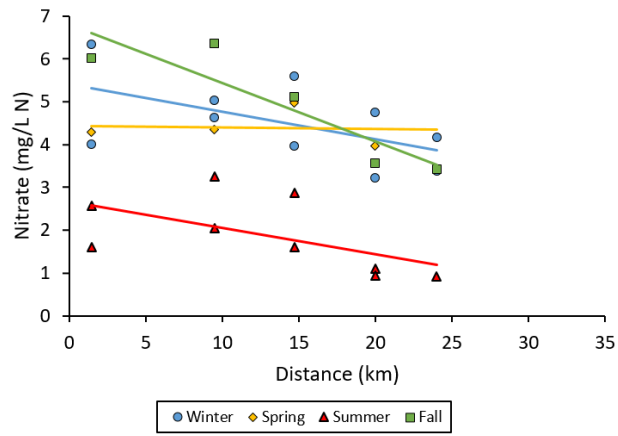

**Figure S2ai.** Nitrate at the Nogales reach of the Santa Cruz River, Arizona.
