# Supplementary material for: Seasonal and longitudinal water quality dynamics in three effluent-dependent rivers in Arizona
Source: PeerJ. 2023 Mar 29;11:e15069. doi: 10.7717/peerj.15069 (PMC10066693; doi:10.7717/peerj.15069)
Supplement: Supplemental Information 1 [file peerj-11-15069-s001.xlsx]

## Sheet: Water Quality
Date	Sites	Distance		DO	Temp	pH	ORP	Cond.	TDS	Salinity	Alkalinity	Tot P	Ammonia	Nitrate	Season
		Mile	Km	(mg/l)	(°C)		mV	μS	(mg/l)	ppt	(mg/l CaCO3)	(mg/l P)	(mg/l N)	(mg/l N)
Tres Rios
2018-01-01	Cortaro	1.44	2.31745	7	23.2	7.84	-49	1247		0.6	171.667	1.37004	0.19	1.51067	Winter
	Twin Peaks	3.5	5.63269	8	21.5	8.13	-66	1225		0.6	155	1.37004	0.323333	1.68
	Avra Valley	6.27	10.0906	7	17.7	8.12	-64	1197		0.6	153.333	1.43528	0.05	2.104
	Tangerine	9.87	15.8842	9	18.3	8.33	-76	1170		0.5	151.667	1.65275	0.0533333	1.42267
	Sanders	12.19	19.6179	8	18.9	8.56	-91	1172		0.5	161.667	1.47877	0.133333	1.22667
	Marana	15.55	25.0252	8	19.2	8.54	-89	1160		0.5	119	1.50052	0.29	3.02
	Trico	17.07	27.4714	8	19.4	8.36	-79	1154		0.5	151.667	1.39179	0.07	1.93733
	Hardin	19.1	30.7384	9	17.3	8.33	-78	1143		0.5	150	1.32655	0.0733333	3.22
2018-02-01	Cortaro	1.44	2.31745	6.7	23	7.97	-46	1252	889	0.6	146.667	1.67449	0.19	2.71333
	Twin Peaks	3.5	5.63269	8.3	22.1	8.35	-67	1255	891	0.6	138.333	1.54401	0.09	3.484
	Avra Valley	6.27	10.0906	8.3	19.4	8.43	-70	1251	888	0.6	145	1.50052	0.05	1.57867
	Tangerine	9.87	15.8842	11.3	20.2	8.94	-97	1247	885	0.6	138.333	1.50052	0.1	3
	Sanders	12.19	19.6179	9.6	20	9.07	-103	1248	886	0.5	138.333	1.50052	0.126667	2.61333
	Marana	15.55	25.0252	9.1	20.8	9.06	-104	1244	885	0.5	140	1.45703	0.0866667	2.44
	Trico	17.07	27.4714	7.9	20.5	8.76	-88	1237	879	0.5	155	1.47877	0.0166667	2.02
	Hardin	19.1	30.7384	8.7	21.5	8.71	-85	1237	877	0.5	151.667	1.39179	0.07	1.77867
2018-03-01	Cortaro	1.44	2.31745	5.4	21.9	7.83	-39	1097	779	0.6	150	1.89196	0.0366667	2.96
	Twin Peaks	3.5	5.63269	7	21.2	8.09	-52	1096	778	0.6	143.333	1.60925	0.0433333	2.064
	Avra Valley	6.27	10.0906	7.7	19	8.15	-55	1089	773	0.5	136.667	1.37004	0.04	3.03333
	Tangerine	9.87	15.8842	10.1	19.9	8.63	-80	1089	773	0.6	136.667	1.50052	0.116667	2.93867
	Sanders	12.19	19.6179	9.4	22.3	8.86	-93	1084	770	0.5	136.667	1.32655	0.0466667	6.41333
	Marana	15.55	25.0252	8.1	23.2	8.65	-83	1080	767	0.5	150	1.27218	0.0233333	4.26933
	Trico	17.07	27.4714	7.3	23.9	8.53	-77	1078	766	0.5	148.333	1.39179	0.04	2.984
	Hardin	19.1	30.7384	8.3	22.6	8.51	-75	1069	759	0.5	148.333	1.15257	0.04	4.04
2018-04-01	Cortaro	1.44	2.31745	5.4	24.7	7.6	-40	1121	796	0.6	135	1.84847	0.203333	1.99333	Spring
	Twin Peaks	3.5	5.63269	7.7	25	7.99	-63	1125	799	0.6	140	1.69624	0.0366667	2.024
	Avra Valley	6.27	10.0906	8.7	23.5	8.18	-74	1124	800	0.6	131.667	1.78323	0.09	1.72667
	Tangerine	9.87	15.8842	10.8	24.3	8.5	-93	1127	800	0.5	138.333	1.84847	0.04	1.16
	Sanders	12.19	19.6179	8.7	27.5	8.61	-100	1133	806	0.5	133.333	1.82672	0.0933333	3.792
	Marana	15.55	25.0252	9.5	27.2	8.73	-108	1132	803	0.5	138.333	1.67449	0.0133333	1.89467
	Trico	17.07	27.4714	7.2	27.9	8.38	-87	1135	806	0.5	145	1.65275	0.0633333	2.54
	Hardin	19.1	30.7384
2018-05-01	Cortaro	1.44	2.31745	5.3	29.5	7.56	-38	1138	809	0.6	138.333	1.60925	0.403333	1.76
	Twin Peaks	3.5	5.63269	5.6	30.6	7.7	-47	1168	830	0.6	130	1.58751	0.1	1.936
	Avra Valley	6.27	10.0906	7.1	22.9	7.72	-48	1156	821	0.5	128.333	1.87021	0.0733333	2.66
	Tangerine	9.87	15.8842	9.6	23.8	8.2	-77	1157	822	0.6	120	1.65275	0.1	1.52667
	Sanders	12.19	19.6179	7	28.8	8.21	-78	1168	829	0.5	133.333	1.73973	0.15	3.35333
	Marana	15.55	25.0252	7.7	31.4	8.4	-90	1168	829	0.6	130	1.60925	0.15	3.29333
	Trico	17.07	27.4714	6.3	32.4	8.18	-77	1172	832	0.6	146.667	1.45703	0.153333	2.38
	Hardin	19.1	30.7384	7.9	33.2	8.32	-86	1160	824	0.6	138.333	1.3048	0.13	2.73333
2018-06-01	Cortaro	1.44	2.31745	4.8	30.7	7.72	-48	1134	805	0.6	153.333	1.65275	0.523333	1.005
	Twin Peaks	3.5	5.63269	6.1	31.8	7.88	-59	1180	838	0.6	146.667	1.78323	0.27	1.14333
	Avra Valley	6.27	10.0906	6.2	24.7	7.8	-53	1152	818	0.6	141.667	1.97895	0.0866667	1.27
	Tangerine	9.87	15.8842	8.4	26	8.15	-74	1156	821	0.6	148.333	1.78323	0.106667	1.65667
	Sanders	12.19	19.6179	8.3	32.7	8.53	-98	1184	840	0.6	148.333	1.60925	0.17	2.68667
	Marana	15.55	25.0252	8.9	32.2	8.57	-101	1084	771	0.6	153.333	1.41353	0.316667	2.88667
	Trico	17.07	27.4714	6.8	34	8.36	-88	1178	837	0.6	153.333	1.43528	0.276667	2.24
	Hardin	19.1	30.7384
2018-07-01	Cortaro	1.44	2.31745	3.9	32	7.62	-44	1231	875	0.6	173.333	1.9572	3.73333	0.99	Summer
	Twin Peaks	3.5	5.63269	4.8	32.2	7.79	-53	1238	879	0.6	181.667	2.00069	3.17333	1.204
	Avra Valley	6.27	10.0906	5.3	27	7.79	-53	1243	882	0.6	173.333	2.21816	2.85333	0.88
	Tangerine	9.87	15.8842	7.9	28.8	8.15	-75	1240	880	0.6	168.333	2.00069	1.78667	0.975
	Sanders	12.19	19.6179	8.6	33.9	8.54	-100	1235	876	0.6	176.667	1.69624	0.746667	1.01333
	Marana	15.55	25.0252	8.5	33.5	8.56	-100	1225	870	0.6	166.667	1.58751	0.13	2.1
	Trico	17.07	27.4714	6.3	34.2	8.3	-85	1218	865	0.6	175	1.41353	0.706667	2.08
	Hardin	19.1	30.7384
2018-08-01	Cortaro	1.44	2.31745	3.4	32.1	7.58	-43	1069	759	0.5	161.667	1.37004	3.2	1.53333
	Twin Peaks	3.5	5.63269	2.9	30.8	7.61	-45	932	662	0.4	140	1.18519	1.25333	1.10267
	Avra Valley	6.27	10.0906	4.2	30.3	7.72	-51	1306	927	0.6	165	1.9572	2.69333	1.11267
	Tangerine	9.87	15.8842	5.7	29.3	7.88	-61	1295	920	0.6	156.667	1.97895	1.93333	1.96533
	Sanders	12.19	19.6179	8.2	33.7	8.37	-91	1286	913	0.6	158.333	1.58751	0.953333	2.29867
	Marana	15.55	25.0252	9	32.2	8.46	-97	1279	908	0.6	148.333	1.25043	0.386667	2.70667
	Trico	17.07	27.4714
	Hardin	19.1	30.7384
2018-09-01	Cortaro	1.44	2.31745	4.1	33.2	7.91	-62	1157	821	0.6	165	1.19607	0.51	0.463667
	Twin Peaks	3.5	5.63269	5.5	33.8	8.21	-80	1183	839	0.6	148.333	1.11995	0.263333	1.22667
	Avra Valley	6.27	10.0906	5.2	28.6	7.5	-39	1203	854	0.6	150	1.16345	0.656667	1.44667
	Tangerine	9.87	15.8842	6.6	29.9	8.03	-70	1210	859	0.6	165	2.47912	0.73	1.30567
	Sanders	12.19	19.6179	7.1	32.6	8.43	-94	1207	857	0.6	151.667	1.28305	0.51	2.608
	Marana	15.55	25.0252	6.6	31.4	8.28	-84	1200	852	0.6	175	1.1417	0.156667	1.86867
	Trico	17.07	27.4714	5.9	32.7	8.22	-81	1193	848	0.6	173.333	1.22869	0.266667	1.936
	Hardin	19.1	30.7384	6.5	32	8.21	-81	1182	840	0.6	181.667	1.10908	0.0133333	1.13
2018-10-13	Cortaro Rd	1.44	2.31745	4.8	27.9	7.71	-33	1124	796	0	151.667	1.56576	2.38667	1.14667	Fall
	TwinPeak	3.5	5.63269	6	28.5	7.98	-45	1161	823	0.6	166.667	1.60925	5.36	1.12133
	Avra Valley	6.27	10.0906	6.2	24.5	7.92	-41	1133	907	0.5	148.333	1.76148	4.61333	2.26667
	Tangerine	9.87	15.8842	7.5	23.7	8.37	-66	1105	780	0.5	146.667	1.21781	0.04	1.317
	Sanders	12.19	19.6179	10.4	22.5	8.47	-71	1188	815	0.6	171.667	1.02209	0.03	1.45667
	Marana	15.55	25.0252	9.2	21.9	8.55	-75	1084	773	0.5	155	1.25043	0.0233333	0.878333
	Trico	17.07	27.4714	8.7	21.1	8.5	-73	1132	795	0.6	188.333	1.25043	1.93333	2.00267
	Hardin	19.1	30.7384	8	19.6	8.2	-61	1115	712	0.6	170	1.01122	0.02	1.88667
2018-11-07	Cortaro Rd	1.44	2.31745	7	28.3	7.83	-49	1021	725	0.5	178.333	1.13083	0.0566667	1.95
	TwinPeak	3.5	5.63269	8.2	28.1	8.13	-67	1035	734	0.5	163.333	1.03297	0.0733333	1.66533
	Avra Valley	6.27	10.0906	8.8	21.5	7.97	-57	1044	741	0.5	173.333	1.19607	0.0533333	4.74667
	Tangerine	9.87	15.8842	9.6	21.4	8.14	-66	1032	733	0.5	173.333	1.06559	0.0333333	3.96533
	Sanders	12.19	19.6179	9.9	24	8.36	-80	1029	730	0.5	158.333	1.11995	0.06	2.60667
	Marana	15.55	25.0252	9.5	23.5	8.3	-75	1020	724	0.5	181.667	1.15257	0.16	2.41333
	Trico	17.07	27.4714	8.6	23.2	8.26	-73	1010	717	0.6	188.333	1.10908	0.0766667	2.2
	Hardin	19.1	30.7384	9.5	20.7	8.22	-70	1008	716	0.5	183.333	1.25261	0.02	2.11333
2018-12-19	Cortaro Rd	1.44	2.31745	5.7	24.2	7.5	-29	1095	778	0.5	151.667	1.27218	4.77333	0.933333
	TwinPeak	3.5	5.63269	7.9	23	7.71	-42	1104	783	0.5	155	1.34829	5.12	0.788333
	Avra Valley	6.27	10.0906	9.1	16.9	7.74	-43	1101	783	0.5	130	1.45703	3.56	3.38667
	Tangerine	9.87	15.8842	10.9	17.1	7.93	-54	1079	766	0.5	135	1.37004	2.38667	3.49333
	Sanders	12.19	19.6179	12.4	18.4	8.34	-78	1073	762	0.5	115	1.37004	1.88	1.19167
	Marana	15.55	25.0252	11.9	17	8.21	-70	1067	757	0.5	136.667	1.23956	0.99	2.88667
	Trico	17.07	27.4714	10.9	16.3	8.05	-61	1066	756	0.5	130	1.26131	0.393333	2.14267
	Hardin	19.1	30.7384	11.4	14.3	8.08	-62	1039	738	0.5	128.333	1.27218	0.196667	1.79
Nogales
2018-01-18	Guy Tobin	0.9	1.44841	7.5	18.7	7.92	-42	778	553	0.3	150	1.631	0.106667	4.00267	Winter
	Palo Perado	5.9	9.49511	7.8	18	8.55	-75	788	559	0.3	163.333	1.39179	0.05	4.64
	Santa Getrudis	9.14	14.7094	7.4	17.1	8.13	-53	812	576	0.3	175	1.25043	0.04	5.6
	Tubac	12.41	19.9719	7	16.4	8.08	-50	885	627	0.4	231.667	1.15257	0.03	3.22
	Chavez Siding	14.91	23.9953	8.8	14.1	8.53	-73	879	624		228.333	1.13083	0.02	3.38667
2018-03-18	Guy Tobin	0.9	1.44841	7.9	19.1	7.96	-46	748	531	0.4	148.333	1.45703	0.03	6.34667
	Palo Perado	5.9	9.49511	8.3	15.1	8.42	-69	726	514	0.3	158.333	1.27218	0.0566667	5.032
	Santa Getrudis	9.14	14.7094	7.9	16.2	8.16	-53	740	526	0.4	186.667	1.20694	0.0166667	3.96533
	Tubac	12.41	19.9719	8.5	14.7	8.23	-59	767	545	0.4	190	1.11995	0.0266667	4.752
	Chavez Siding	14.91	23.9953	11	17.1	8.93	-95	758	538	0.4	203.333	0.73395	0.01	4.168
2018-05-01	Guy Tobin	0.9	1.44841	7.7	26.4	7.76	-53	778	552	0.4	163.333	1.47877	0.04	4.28267	Spring
	Palo Perado	5.9	9.49511	7	24.2	8.13	-73	767	545	0.4	156.667	1.65275	0.0333333	4.34667
	Santa Getrudis	9.14	14.7094	7.5	23.8	7.92	-60	770	547	0.3	196.667	1.1417	0.0233333	4.97333
	Tubac	12.41	19.9719	7.9	24.5	7.86	-56	835	593	0.4	241.667	0.467553	0.0433333	3.96
	Chavez Siding	14.91	23.9953
2018-07-01	Guy Tobin	0.9	1.44841	5.7	30.3	7.79	-55	643	456	0.3	151.667	1.80497	0.0666667	2.57733	Summer
	Palo Perado	5.9	9.49511	5.2	28.6	7.99	-67	515	365	0.2	125	1.28305	0.136667	2.04533
	Santa Getrudis	9.14	14.7094	5	28.4	7.87	-59	542	385	0.3	165	1.18519	0.126667	1.59667
	Tubac	12.41	19.9719	5.8	25	7.86	-58	415	295	0.2	108.333	0.924233	0.23	1.10333
	Chavez Siding	14.91	23.9953	6.2	27.9	7.75	-55	359	255	0.2	106.667	0.8155	0.0866667	0.908667
2018-09-01	Guy Tobin	0.9	1.44841	5.9	25.7	8.02	-68	700	497	0.4	153.333	1.89196	0.0366667	1.6
	Palo Perado	5.9	9.49511	6.2	21.7	8.11	-72	700	429	0.3	171.667	1.50052	0.0266667	3.26
	Santa Getrudis	9.14	14.7094	6.5	20.6	7.95	-63	744	528	0.3	190	1.25043	0.0566667	2.86667
	Tubac	12.41	19.9719	6	20.3	7.58	-42	910	647	0.4	253.333	1.03297	0.0333333	0.94
	Chavez Siding	14.91	23.9953
2018-11-01	Guy Tobin	0.9	1.44841	7.7	20.5	7.78	-45	701	498	0.3	173.333	1.06559	0.0833333	6.01333	Fall
	Palo Perado	5.9	9.49511	9	17.1	8.1	-63	713	506	0.3	151.667	1.1417	0.00666667	6.36
	Santa Getrudis	9.14	14.7094	9.2	17.2	7.82	-47	751	533	0.4	198.333	1.10908	0.02	5.10667
	Tubac	12.41	19.9719	10.2	14.3	7.93	-53	787	559	0.4	213.333	1.02209	0.00666667	3.568
	Chavez Siding	14.91	23.9953	14.1	13.9	8.42	-88	779	553	0.4	196.667	1.07646	0.0233333	3.432
Agua Nueva
2018-02-01	CC Park	1.2	1.93121	6.4	25	7.64	-29	1226	871	0.6	173.333	1.65275	0.6	1.51733	Winter
	Sunset	3.2	5.14989	6.7	19.9	8.06	-50	1250	887	0.6	165	1.52227	0.0466667	2.2
	West Belmoth	5.36	8.62606	10.5	14.3	8.49	-72	1278	907	0.6	155	2.30515	0.00433333	3.33067
2018-06-01	CC Park	1.2	1.93121	5.9	31.6	7.57	-40	1204	855	0.6	176.667	1.06559	0.493333	1.32267	Spring
	Sunset Rd	3.2	5.14989	5.1	32.7	7.84	-57	1250	887	0.6	168.333	1.18519	0.446667	1.772
	West Belmont Rd.	5.36	8.62606	5.3	25.8	7.56	-40	1282	912	0.6	193.333	1.06559	0.143333	0.838667
2018-09-01	CC Park	1.2	1.93121	5.5	32	7.8	-57	1195	848	0.6	175	0.989473	1.18	0.823667	Summer
	Sunset Rd	3.2	5.14989	5.2	32.1	8.07	-72	1210	859	0.6	171.667	0.837247	0.303333	0.993333
	West Belmont Rd.	5.36	8.62606	9	31.6	8.65	-107	1246	885	0.6	166.667	1.20694	0.106667	1.956
2018-11-01	CC Park	1.2	1.93121	6.5	26.6	7.75	-44	1041	739	0.5	193.333	1.39179	0.74	0.541	Fall
	Sunset Rd	3.2	5.14989	7.1	25.6	8.06	-61	1064	754	0.5	171.667	0.857906	0.186667	1.46
	West Belmont Rd.	5.36	8.62606	9.6	24.8	8.36	-80	1069	759	0.5	75	0.565413	0.11	3.06
Salt River
2018-02-17	Outfall WWTP	0	0	8	21.5	7.79	-36	1764	1250	0.7	208.333	2.23991	1.24	1.35867	Winter
	S 109 Ave	1.58	2.54276	8.8	20.9	7.92	-43	1924	1370	0.8	191.667	2.10943	0.863333	1.16767
	S El Mirage Rd.	3.35	5.39129	9.1	19.9	8.02	-48	2670	1890	1.1	191.667	1.97895	0.676667	5.89333
2018-06-07	Outfall WWTP	0	0	7.6	28.4	7.71	-48	2190	1550	1.1	173.333	2.32689	0.0833333	0.738333	Spring
	S 109 Ave	1.58	2.54276	7	28.3	7.8	-54	2430	1730	1.1	196.667	2.19641	0.386667	1.41067
	S El Mirage Rd.	3.35	5.39129	14.3	29.1	8.46	-94	3280	2330	1.6	195	1.78323	0.47	0.801333
2018-09-16	Outfall WWTP	0	0	6	30.1	5.03	-107	2150	1520	1	170	2.23991	0.99	1.22167	Summer
	S 109 Ave	1.58	2.54276	6.1	30.3	5	-109	2300	1630	1	180	2.10943	0.296667	3.24
	S El Mirage Rd.	3.35	5.39129	7.8	29.6	4.96	-111	3410	2420	1.6	188.333	1.91371	0.31	0.836
2018-11-21	Outfall WWTP	0	0	10.1	19.7	7.45	-26	1710	1210	0.8	161.667	1.82672	0.746667	2.32	Fall
	S 109 Ave	1.58	2.54276	8.9	19	7.48	-28	1825	1300	0.9	193.333	1.71799	0.0666667	3.48
	S El Mirage Rd.	3.35	5.39129	8.1	18	7.54	-31	2690	1910	1.2	188.333	1.9572	0.05	2.48667
Rio de Flag (Central)
2018-03-01	Rio de Flag 1	0	0	5.7	17.6	7.63	-28	633	449	0.3	170	0.223991	0.206667	2.10267	Winter
	Rio de Flag 2	1.07	1.72199	15.4	16.6	9.5	-125	622	441	0.3	166.667	1.31567	0.206667	1.39733
	Rio de Flag 3	1.71	2.75197	15.6	17.2	9.72	-137	620	440	0.3	175	1.37004	0.306667	1.24167
2018-06-19	Rio de Flag 1	0	0	5.8	22.6	7.68	-46	620	441	0.3	180	0.133742	0.316667	1.748	Spring
	Rio de Flag 2	1.07	1.72199	6.4	26.1	9.28	-141	663	470	0.3	203.333	0.772007	0.14	0.368667
	Rio de Flag 3	1.71	2.75197	7.1	23.3	8.79	-111	1001	707	0.5	383.333	1.1417	0.143333	1.08233
2018-07-23	Rio de Flag 1	0	0	5.6	22.6	7.53	-38	601	426	0.3	150	0.208768	0.0466667	5.81333	Summer
	Rio de Flag 2	1.07	1.72199	4.5	21.3	7.52	-38	596	427	0.3	136.667	0.220729	0.0833333	5.28
	Rio de Flag 3	1.71	2.75197	3.8	21.6	7.77	-52	585	416	0.3	155	0.206593	0.0533333	5.62667
2018-11-05	Rio de Flag 1	0	0	14.6	11.6	9.19	-121	635	451	0.2	215	0.44037	0.02	1.71867	Fall
	Rio de Flag 2	1.07	1.72199	20.6	13.7	9.58	-177	647	460	0.3	198.333	0.434933	0.0366667	0.176333
	Rio de Flag 3	1.71	2.75197	11.6	9.2	9.91	-178	648	452	0.3	176.667	0.380567	0.07	0.077
Wildcat Hill
2018-03-01	Wildcat Hill 1	0	0	6.4	16.7	7.37	-14	684	486	0.3	108.333	2.21816	0.21	1.6	Winter
	Wildcat Hill 2	0.95	1.52887	6.6	15.4	8.39	-67	687	487	0.3	120	2.37039	0.14	3.40267
	Wildcat Hill 3	1.41	2.26917	6.5	15.8	8.4	-68	690	490	0.3	110	2.19641	0.11	1.50667
	Wildcat Hill 4	2.51	4.03944
2018-06-18	Wildcat Hill 1	0	0	9.9	21.1	8.15	-73	742	527	0.4	136.667	0.150052	0.32	6.49333	Spring
	Wildcat Hill 2	0.95	1.52887	6.7	19.8	8.37	-85	752	534	0.3	140	0.330549	0.163333	5.88
	Wildcat Hill 3	1.41	2.26917	7.8	22.6	8.51	-94	757	537	0.3	145	0.39144	0.146667	4.97333
	Wildcat Hill 4	2.51	4.03944	2.7	25.8	7.74	-49	698	496	0.3	143.333	1.52227	0.0533333	2.384
2018-07-18	Wildcat Hill 1	0	0	4.9	25.4	7.04	-10	760	545	0.3	125	2.39213	0.0633333	2.276	Summer
	Wildcat Hill 2	0.95	1.52887	4.9	27.2	7.5	-38	744	547	0.3	101.667	3.52296	0.18	3.70933
	Wildcat Hill 3	1.41	2.26917	5	25.1	7.62	-45	752	541	0.3	105	3.21851	0.153333	2.39333
	Wildcat Hill 4	2.51	4.03944	5.8	31.5	7.16	-19	805	566	0.3	91.6667	3.34899	0.06	2.84
2018-11-05	Wildcat Hill 1	0	0	8.4	18.9	7.52	-32	713	505	0.4	175	1.56576	0.246667	0.876667	Fall
	Wildcat Hill 2	0.95	1.52887	7.4	16.5	8.25	-71	715	507	0.4	166.667	1.80497	0.126667	1.43933
	Wildcat Hill 3	1.41	2.26917	7	14.1	8.13	-64	729	518	0.4	155	1.93545	0.14	1.46667
	Wildcat Hill 4	2.51	4.03944	6.3	14.8	7.92	-53	744	529	0.4	161.667	2.13117	0.173333	1.368
